# Supplementary material
Source: PubMed Central journal article supplement (PMC8558115)
Supplement: 12250_2021_348_MOESM1_ESM.pdf [file 12250_2021_348_MOESM1_ESM.pdf]

## Electronic Supplementary Material

### Alterations in Phenotypes and Responses of T Cells within 6 Months of Recovery from COVID-19: A Cohort Study

Bali Zhao<sup>1,9</sup> • Maohua Zhong<sup>2</sup> • Qingyu Yang<sup>1,5,6</sup> • Ke Hong<sup>5,6</sup> • Jianbo Xia<sup>7</sup> • Xia Li<sup>5,6</sup> • Ying Liu<sup>6,8</sup> • Yao-Qing Chen<sup>3</sup>✉ • Jingyi Yang<sup>4</sup>✉ • Chaolin Huang<sup>5,6</sup>✉ • Huimin Yan<sup>1,4,9</sup>✉

1. State Key Laboratory of Virology, Wuhan Institute of Virology, Center for Biosafety Mega-Science, CAS, Wuhan 430071, China
2. Institute of Infection, Immunology and Tumor Microenvironment, Hubei Province Key Laboratory of Occupational Hazard Identification and Control, Medical College, Wuhan University of Science and Technology, Wuhan 430065, China.
3. School of Public Health (Shenzhen), Sun Yat-sen University, Shenzhen 518107, China
4. Shanghai Public Health Clinical Center, Fudan University, Shanghai 201508, China
5. Joint Laboratory of Infectious Diseases and Health, Wuhan Institute of Virology & Wuhan Jinyintan Hospital, Wuhan Jinyintan Hospital, Wuhan 430023, China
6. Center for Translational Medicine, Jinyintan Hospital, Wuhan 430023, China
7. Department of Laboratory Medicine, Maternal and Child Health Hospital of Hubei Province, Tongji Medical College, Huazhong University of Science and Technology, Wuhan 430070, China
8. The Office of Drug Clinical Trial Institution, Jinyintan Hospital, Wuhan 430023, China
9. University of Chinese Academy of Sciences, Beijing 100049, China

Supporting information to DOI: 10.1007/s12250-021-00348-0

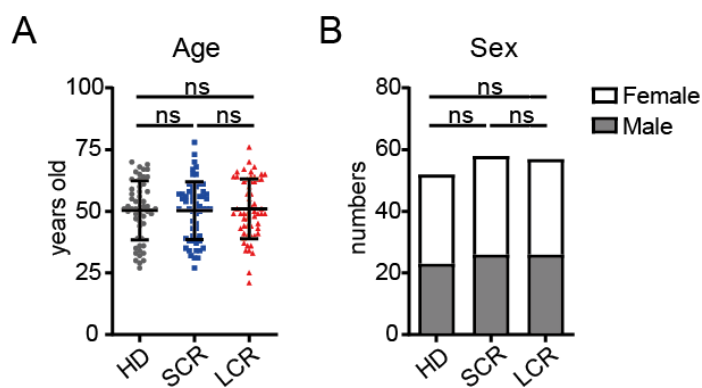

**Fig. S1** Age and sex distribution of HD, SCR and LCR cohorts. In Fig. S1A, results are expressed as mean  $\pm$  S.D., statistical difference was calculated with one-way ANOVA. In addition, a chi-square test was used to analyze the difference in sex distribution of each cohort in Fig. S1B. ns, non-significant.

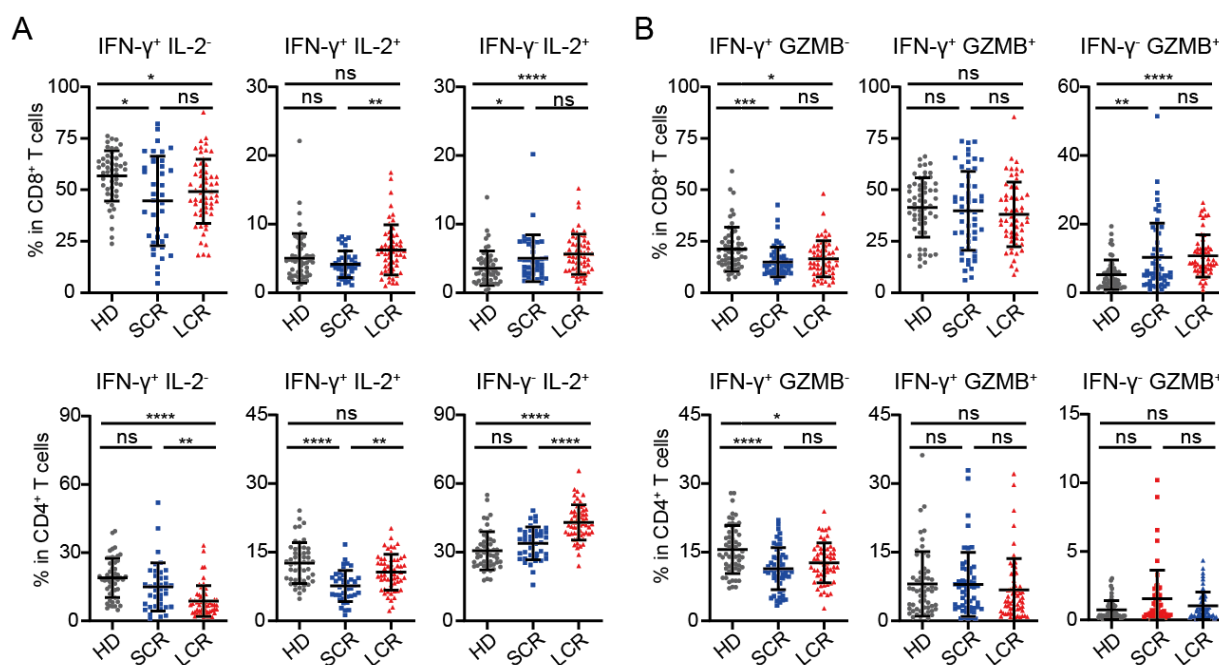

**Fig. S2** Co-expression of INF- $\gamma$  and IL-2, or INF- $\gamma$  and granzyme B on CD8<sup>+</sup> T or CD4<sup>+</sup> T cells in PBMCs of HD, SCR and LCR cohorts. PBMCs were stimulated with PMA and ionomycin for 4.5 h in the presence of BFA and monensin. After surface staining, PBMCs were intracellularly stained with mAbs specific to INF- $\gamma$ , IL-2 and granzyme B and then analyzed by flow cytometry. **A** Co-expression of INF- $\gamma$  and IL-2 on CD8<sup>+</sup> T or CD4<sup>+</sup> T cells. **B** Co-expression of INF- $\gamma$  and granzyme B on CD8<sup>+</sup> T or CD4<sup>+</sup> T cells. Results are shown as mean  $\pm$  S.D. One-way ANOVA was used to analyze the statistical difference. ns, non-significant; \*,  $P < 0.05$ ; \*\*,  $P < 0.01$ ; \*\*\*,  $P < 0.001$ ; \*\*\*\*,  $P < 0.0001$ .

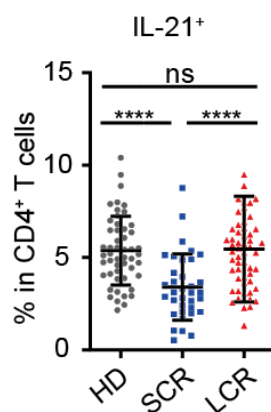

**Fig. S3** Frequency of IL-21<sup>+</sup> cells in CD4<sup>+</sup> T cells of PBMCs in HD, SCR and LCR cohorts. PBMCs were stimulated with PMA and ionomycin for 4.5 h in the presence of BFA and monensin, frequencies of IL-21<sup>+</sup> CD4<sup>+</sup> T cells were displayed. One-way ANOVA was used to analyze the statistical difference. ns, non-significant; \*\*\*\*,  $P < 0.0001$ .

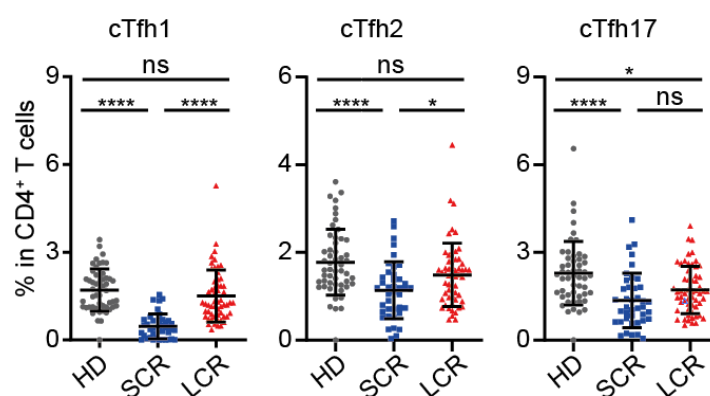

**Fig. S4** Categorical subsets of circulating Tfh (cTfh) cells in CD4<sup>+</sup> T cells in PBMCs of HD, SCR and LCR cohorts. Frequencies of CXCR3<sup>+</sup> CCR6<sup>-</sup> cells (cTfh1), CXCR3<sup>-</sup> CCR6<sup>-</sup> cells (cTfh2) and CXCR3<sup>-</sup> CCR6<sup>+</sup> cells (cTfh17) in CD4<sup>+</sup> T cells were shown. Results are shown as mean  $\pm$  S.D. One-way ANOVA was used to analyze the statistical difference. ns, non-significant; \*,  $P < 0.05$ ; \*\*\*\*,  $P < 0.0001$ .
